# Supplementary material
Source: publisher site journal article supplement (https://www.dovepress.com/get_supplementary_file.php?f=275373.xlsx)
Supplement: Supplementary file 1 [file get_supplementary_file.php]

## Sheet: Table S1
Table S1 The original data of fluorescence spectral changes detected during irradiation of TiO2-B＠anatase nanowires for 2 h in 2×10-3 M NaOH solution of terephthalic acid (excitation at 315 nm)
wavelength/time	0 min	15 min	30 min	45 min	60 min	75 min	90 min	120 min
340	0.84	3.78	5.44	7.01	8.54	8.65	9.37	9.84
341	0.28	3.82	5.48	7.63	9.06	9.21	9.92	10.64
342	0.19	3.56	5.78	8.06	9.43	9.87	10.56	10.98
343	0.18	3.68	5.82	8.18	9.52	9.96	10.57	11.11
344	0.24	3.78	5.83	8.23	9.63	10.34	10.57	12.24
345	0.19	3.7	5.76	8.94	10.23	10.46	11.25	12.96
346	0.24	3.78	5.78	9.58	10.84	10.99	11.45	13.54
347	0.13	3.82	5.84	9.76	10.64	11.24	11.26	14.06
348	0.19	4.56	5.78	9.88	10.98	11.21	12.46	14.43
349	0.18	4.82	5.82	9.87	11.11	12.19	12.54	14.52
350	1.09	5.35	5.92	10.11	11.24	12.18	12.2	14.38
351	1.09	5.2	6.3	10.66	11.96	12.97	13.62	15.3
352	1	5.95	6.83	10.01	11.54	12.65	13.26	15.62
353	0.91	6.75	7.44	10.63	12.06	12.21	13.37	16.08
354	0.84	7.6	7.48	10.06	12.43	12.87	13.92	16.66
355	0.28	7.76	7.78	10.18	12.52	12.96	14.56	16.58
356	0.19	7.78	7.82	10.23	12.63	13.34	14.57	17.73
357	0.18	7.82	7.83	10.94	13.23	13.46	14.57	17.74
358	0.24	8.56	8.76	11.58	13.84	13.99	14.25	17.77
359	0.19	8.68	8.78	11.76	13.64	14.24	14.45	18.07
360	0.24	8.78	8.84	11.88	13.73	14.96	15.26	19.33
361	0.13	8.7	8.78	11.85	13.81	15.35	15.33	20.57
362	0.19	8.78	8.82	11.23	14.13	16.54	17.57	28.83
363	0.18	9.82	9.83	15.54	18.23	22.26	28.07	39.14
364	0.24	9.56	12.76	17.78	22.84	28.39	37.25	49.37
365	0.18	9.82	15.23	20.94	28.23	36.46	47.57	55.74
366	0.24	9.56	18.76	22.78	32.84	41.99	54.25	60.37
367	0.24	9.78	22.84	29.88	41.93	50.96	65.46	80.63
368	0.13	10.23	25.34	38.43	50.65	59.78	74.21	91.35
369	0.59	10.78	28.87	48.86	61.34	76.24	95.56	105.88
370	0.97	15.54	31.17	59.53	71.46	82.46	103.53	114.02
371	1.22	20.75	34.24	67.78	86.84	103.99	121.25	141.37
372	2.45	25.35	54.54	83.34	94.32	112.21	132.54	154.32
373	3.64	35.34	69.86	95.14	110.63	132.45	152.13	177.32
374	4.35	47.54	83.42	109.43	123.25	159.45	178.42	196.32
375	5.65	59.45	93.89	118.35	130.41	170.24	194.14	214.23
376	8.38	83.82	112.44	147.21	177.87	237.67	260.34	284.56
377	10.11	91.64	124.22	166.92	219.34	272.47	304.26	327.9
378	9.98	106.54	139.9	208.16	260.97	333.34	364.27	381.24
379	12.32	117.61	150.87	250.31	329.29	374.3	402.75	429.4
380	14.32	127.31	171.65	281.23	353.3	413.63	443.26	467.5
381	16.04	140.58	188.65	290.6	367.47	425.04	457.2	470.45
382	15.87	155.02	206.68	321.72	395.01	451.31	484.78	507.92
383	16.49	174.96	237.31	354.14	426.82	490.14	520.16	549.36
384	16.52	192.88	261.19	389.91	452.24	514.88	539.84	552.01
385	16.52	212.4	288.52	405.35	473.43	538.5	563.06	584.79
386	16.76	233.57	322.86	444.1	516.62	568.23	590.02	610.98
387	17.05	252.75	348.84	468.54	531	591.56	617.3	633.65
388	17.23	269.78	376.27	497.63	562.37	622.47	651.2	675.48
389	17.22	291.66	403.29	521.21	591.3	652.37	685.71	705.9
390	17.62	315.8	431.91	572.1	643.46	701.85	732.56	754.87
391	18.14	340.67	464.69	600.85	671.43	740.06	771.54	798.9
392	18.28	360.12	488.7	620.32	691.51	762.65	792.61	814.43
393	18.64	384.6	522.77	662.01	737.59	801.06	829.39	843.67
394	19.4	407.13	545.51	688.65	763.75	830.33	860.32	887.3
395	19.7	431.74	578.27	710.54	790.3	861.96	888.18	902.07
396	20.29	454.51	604.51	744.27	833.83	908.85	932.5	957.04
397	20.43	476.86	691.65	830.94	912.94	988.85	1010.3	1031.85
398	20.9	510.31	740.69	880.86	965.26	1038.87	1058.04	1077.11
399	21.77	537.89	777.46	920.93	1013.24	1082.79	1111.82	1129.45
400	22.82	577.51	835.68	972.46	1056.15	1122.61	1143.52	1157.58
401	23.04	609.39	888.35	1021.09	1102.82	1181	1203.66	1218.39
402	23.48	649.25	942.07	1065.57	1139.2	1223.04	1243.05	1257.72
403	23.68	675.49	985.49	1102.08	1173.47	1273.85	1294.82	1309.89
404	24.36	773.8	1025.62	1145.8	1221.15	1325.28	1343.23	1357.99
405	24.42	804.19	1071.81	1191.24	1272.77	1350.48	1375.58	1391.81
406	25.35	844.56	1118.93	1241.32	1317.8	1392.16	1414.7	1428.07
407	25.18	877.47	1159.43	1293.85	1371.92	1422.84	1441.51	1455.78
408	25.53	900.82	1183.69	1329.42	1402.73	1462.34	1487.46	1451.06
409	25.18	920.15	1204.9	1354.42	1426.52	1485.71	1502.82	1518.98
410	25.75	932.54	1220.59	1367.59	1442.48	1510.11	1531.04	1545.33
411	25.76	942.27	1229.13	1376.36	1451.59	1521.27	1540.68	1554.39
412	24.99	946.85	1232.41	1381.11	1470.51	1543.41	1568.03	1583.75
413	25.38	966.26	1264.3	1417.21	1493.64	1565.9	1583.14	1598.32
414	26.17	984.85	1287.22	1439.07	1510.88	1573.07	1599.66	1622.71
415	26.36	997.22	1306.58	1454.72	1539.58	1599.65	1618.89	1633.04
416	26.18	1012.75	1323.67	1474.64	1562.73	1615.82	1635.91	1650.8
417	26.34	1024.34	1338.64	1496.76	1573.05	1619.31	1637.99	1652.61
418	26.51	1024.93	1345.17	1503.91	1580.55	1629.95	1646.62	1661.26
419	26.76	1033.18	1353.67	1503.02	1584.72	1638.56	1655.11	1666.78
420	27	1032.22	1358.67	1523.39	1605.63	1650.95	1670.64	1686.12
421	26.25	1039.56	1360.2	1524.8	1615.66	1658.95	1675.31	1690.33
422	26.38	1038.69	1361.17	1536.85	1620.32	1663.98	1689.84	1700.99
423	26.68	1041.07	1372.26	1547.71	1626.36	1671.35	1693.84	1702.99
424	26.59	1042.07	1371.59	1553.93	1630.45	1676.67	1698.32	1707.79
425	26.73	1045.56	1375.98	1555.28	1632.25	1678.63	1699.72	1709.36
426	26.59	1037.15	1373.73	1550.24	1629.23	1675.37	1694.32	1707.19
427	25.86	1032.66	1357.21	1540.86	1625.8	1668.82	1690.45	1702.93
428	26.5	1026.82	1355.03	1531.28	1619.3	1658.44	1681.66	1692.46
429	26.4	1018.42	1349.59	1510.76	1595.92	1651.57	1676.44	1690.83
430	25.84	1007.67	1343.63	1487.3	1569.51	1642.43	1670.1	1683.29
431	26.25	992.12	1325.26	1465.55	1547.67	1630.7	1652.29	1662.79
432	25.75	978.33	1309.14	1445.82	1528.55	1610.63	1639.17	1651.75
433	26.24	964.46	1293.96	1436.01	1518.57	1592.92	1615.46	1629.09
434	25.96	952.21	1280.43	1423.1	1507.38	1578.88	1598.23	1609.78
435	25.63	937.03	1257.96	1406.23	1490.02	1563.82	1582.12	1594.24
436	25.59	925.33	1244.04	1387.21	1466.29	1537.82	1558.47	1570.4
437	25.64	907.81	1227.11	1366.51	1437.65	1503.62	1528.49	1536.14
438	25.59	893.2	1211.09	1341	1413.93	1472.67	1494.71	1518.81
439	25.76	885.29	1198.91	1322.41	1399.86	1450.9	1472.56	1498.45
440	25.88	870.63	1184.49	1312.33	1381.1	1440.27	1464.42	1483.58
441	25.78	855.74	1165.92	1292.29	1366.58	1420.53	1439.13	1450.68
442	26.22	842.54	1150.2	1287.96	1355.5	1396.75	1413.27	1436.92
443	25.56	827.71	1126.49	1261.49	1334.71	1374.5	1392.64	1413.67
444	25.16	807.58	1101.43	1235.62	1301.25	1350.24	1378.93	1395.89
445	24.92	794.74	1082.04	1203.28	1271.32	1323.21	1344.95	1362.48
446	25.29	772.3	1059.54	1166.28	1236.28	1289.63	1314.72	1337.68
447	24.86	756.54	1033.56	1142.6	1213.04	1262.01	1286.99	1302.82
448	24.79	730.21	1003.53	1102.73	1170.66	1224.85	1242	1265.9
449	24.16	705.46	969.31	1066.8	1138.4	1179.18	1197.58	1214.36
450	23.81	677.37	935.5	1031.82	1103.84	1164.02	1180.76	1204.59
451	23.12	658.42	904.16	997.83	1063.16	1121.92	1139.48	1157.18
452	22.94	632.33	874.97	965.26	1038.39	1092.33	1115.27	1138.39
453	22.59	607.39	835.96	929.9	1001.98	1061.02	1082.4	1107.15
454	21.76	576.58	796.39	879.17	942.64	1000.68	1020.65	1045.13
455	21.41	551.76	761.25	849.3	918.75	981.97	1003.33	1028.29
456	20.73	525.52	728.07	809.64	880.66	948.53	961.36	993.4
457	20.09	502.56	694.54	772.6	848.24	907.11	930.04	954.71
458	19.7	482.72	666.9	745.85	819.11	879.82	899.51	920.65
459	19.38	462.66	643.17	717.91	789.51	849.97	867.55	893.63
460	19.09	444.72	617.24	694.41	766.27	829.18	845.94	867.55
461	18.6	429.88	597.86	664.24	732.14	795.94	816.51	839.46
462	18.18	411.54	575.19	644.03	719.58	769.32	785.05	807.26
463	17.75	400.9	556.21	609.2	679.63	729.99	752.02	784.97
464	17.58	389.12	541.35	594.25	661.46	711.11	735.68	756.09
465	16.84	378.07	521.94	568.64	633.58	683.76	701.09	721.24
466	16.66	363.41	507.22	552.67	613.48	658.3	681.24	707.74
467	16.28	354.71	491.18	531.63	598.17	639.25	659.3	677.26
468	16.27	344.59	475.74	522.04	581.3	620.65	640.02	660.17
469	15.93	333.9	463.37	508.63	564.79	603.62	622.62	644.44
470	15.82	319.19	448	492.08	551.77	586.07	603.88	626
471	15.56	310.91	431.57	477.38	533.78	569.72	589.13	608.44
472	15.53	301.25	421.45	459.85	517.46	542.05	568.92	591.77
473	15.33	291	405.94	445.35	501.3	524.33	542.17	563.7
474	15.08	281.06	389.89	429.65	490.06	516.22	533.05	555.88
475	14.79	268.66	374.74	411.99	470.22	499.14	507.98	525.47
476	14.48	258.42	356.67	398.46	451.66	480.81	501.72	527.09
477	14.19	247.36	341.16	378.85	434.34	461.49	480.55	507.77
478	14.07	236.72	326.13	359.33	413.07	442.64	462.39	489.43
479	14.26	227.89	314.07	353.03	402.81	432.76	450.19	473.45
480	13.92	217.59	301.29	335.59	398.73	425.62	439.78	458.36
481	13.8	209.6	287.82	328.32	387.15	411.29	435.49	460.12
482	13.39	200.4	275.33	316.87	356.23	383.63	408.2	431.2
483	13.12	193.79	265.56	299.87	325.14	350.61	365.53	381.84
484	13.12	187.49	256.51	280.22	316.42	340.08	360.03	381.52
485	13	181.34	247.31	271.48	306.23	338.33	352.42	379.07
486	13.1	175.58	239.86	264.94	288.71	318.65	330.62	351.24
487	13.01	169.11	232.23	253.55	278.1	300.78	316.33	341.34
488	13.01	164.79	225.07	248.93	268.83	290.77	301.28	323.49
489	12.84	160.49	217.83	242.46	263.25	284.33	302.48	322.76
490	12.87	156.51	212.06	237.23	252.29	277.05	283.63	306.28
491	12.64	151.65	207.11	233.23	248.5	262.49	273.87	291.85
492	12.68	148.14	199.7	230.01	241.25	258.19	267.49	285.52
493	12.59	144.85	196.38	227.51	231.84	250.17	263.72	287.41
494	12.46	140.24	189.99	214.24	225.79	244.14	250.01	271.63
495	12.67	137.56	185.47	209.57	219.88	235.9	242.8	266.55
496	12.49	133.6	178.31	203.81	211.93	230.92	240.37	259.43
497	12.58	129.41	172.4	197.84	206.46	225.53	232.36	252.51
498	12.45	125.59	167.09	188.98	201.69	226.32	230.32	251.28
499	12.52	121.5	161.8	184.55	193.45	214.95	223.61	241.23
500	12.32	117.08	154.64	170.06	188.97	208.62	212.42	238.13
501	12.33	112.45	149.6	163.23	178.76	193	204.48	221.16
502	12.2	108.13	142.62	158.02	170.01	190.37	199.04	217.08
503	12.15	103.71	136.76	155.26	164.67	180.11	188.17	205.75
504	12.05	100.11	130.22	150.22	161.11	178.21	185.59	204.71
505	12.01	96.22	125.74	148.35	156.35	173.73	182.53	202.96
506	12.27	93.09	119.68	139.03	155.34	172.63	180.24	200.02
507	12.09	89.24	115.07	132.83	150.36	167.26	172.29	199.25
508	12.04	88.1	110.03	130.73	148.45	165.35	170.7	196.47
509	11.91	85.54	109.64	129.53	147.27	164.83	170.25	193.21
510	12.1	83.87	106.13	127.24	145.37	162.56	168.54	181.54
511	11.76	82.71	103.77	126.28	141.26	158.35	162.25	180.6
512	12.15	79.6	100.75	120.98	139.34	156.62	161.23	180.18
513	11.9	78.08	98.43	119.41	135.37	152.92	158.2	179.23
514	11.77	72.17	95.58	116.77	132.23	149.4	155.34	175.43
515	11.67	68.14	90.91	113.23	128.14	145.24	149.92	170.35
516	11.53	62.91	85.38	110.21	124.23	141.12	148.87	165.83
517	11.82	58.24	80.8	103.23	120.1	137.34	145.23	164.92
518	11.94	52.87	75.91	99.01	115.29	132.34	140.41	160.23
519	11.71	48.71	70.81	93.34	111.09	128.12	135.23	155.32
520	11.98	45.92	68.34	89.27	108.92	125.91	130.23	153.83
521	11.62	40.23	65.6	85.42	95.32	120.32	127.34	148.82
522	12.21	38.83	62.33	80.3	93.23	108.34	115.93	138.34
523	11.82	36.43	58.53	78.43	88.34	103.95	113.45	135.23
524	11.72	33.56	56.64	75.45	85.53	100.45	107.09	123.32
525	11.96	32.13	53.22	72.21	83.34	98.4	105.32	111.53
526	12.01	30.23	50.34	70.6	78.33	92.43	98.32	105.34
527	11.48	28.09	48.32	66.39	76.09	90.73	96.45	103.5
528	12.04	27.98	46.32	62.32	73.1	86.32	95.34	102.32
529	12.04	25.43	44.22	60.3	70.45	83.34	93.22	100.32
530	11.97	24.23	42.34	55.32	65.23	77.34	91.21	98.33
531	11.67	22.83	40.87	52.35	62.89	74.09	79.36	86.32
532	11.68	21.11	38.34	50.92	58.42	70.33	77.43	84.34
533	11.82	20.12	36.35	46.92	57.81	68.34	75.24	82.23
534	12	19.23	35.33	45.24	55.36	66.42	73.46	80.21
535	11.75	18.33	33.45	43.23	53.32	64.2	71.24	79.14
536	11.96	16.34	32.13	42.34	50.21	61.45	69.22	75.13
537	11.83	16.01	31.09	41.78	49.22	60.32	67.21	72.33
538	10.34	14.3	30.54	40.23	46.31	57.91	65.29	68.22
539	9.18	13.93	29.18	38.91	42.19	52.2	64.24	67.11
540	9.09	13.02	28.42	37.13	40.24	49.09	63.23	65.22
541	8.83	12.34	27.32	35.19	36.34	40.12	52.34	55.81
542	8.43	11.57	26.35	34.35	35.43	39.33	41.12	43.27
543	8.09	10.33	23.35	32.19	33.45	38.42	40.13	42.6
544	7.67	10.09	19.67	28.87	32.57	37.4	39.63	40.13
545	7.43	9.32	17.56	27.45	30.32	36.33	37.54	38.44
546	7.39	9.09	15.01	19.78	26.43	32.2	36.24	37.27
547	7.35	9	12.87	17.03	22.01	27.98	30.01	31.91
548	7.18	8.53	10.34	15.43	19.34	22.22	23.09	23.28
549	7.01	8.02	9.54	10.87	13.34	14.21	20.08	21.98
550	6.45	7.45	8.34	8.76	9.32	9.44	19.42	21.32
551	6.94	8.33	8.13	8.22	9.24	9.91	16.23	20.13
552	6.71	8.45	8.09	8.31	9.23	9.83	14.91	18.09
553	6.98	7.13	7.94	8.19	9.34	9.79	13.13	16.54
554	6.62	7.09	7.18	8.24	9.12	9.35	12.19	15.18
555	5.21	6.54	7.42	7.34	9.13	9.29	11.35	14.42
556	5.82	6.18	7.32	7.43	8.63	8.87	10.19	13.32
557	5.72	6.42	7.35	7.45	8.54	8.81	9.87	12.35
558	4.96	5.32	7.35	6.57	8.24	8.78	9.45	11.35
559	5.01	5.35	6.67	6.32	8.01	8.67	9.38	10.67
560	4.48	5.35	6.56	6.43	8.09	8.43	9.03	10.56

## Sheet: Table S2
Table S2 The original data of fluorescence intensity of different samples (four samples of each group in the corresponding time interval)
Time/Intensity	NWs+UV	NWs	UV
0 min	98.45	74.23	38.53
	64.85	63.13	58.65
	85.43	62.12	87.56
	101.24	47.24	59.75
15 min	1043.32	64.24	32.64
	954.32	74.34	85.35
	899.43	95.35	74.32
	1098.21	68.35	47.75
30 min	1298.42	64.74	73.24
	1401.21	74.34	65.53
	1287.44	83.23	44.67
	1398.42	46.35	64.24
45 min	1653.42	85.64	38.95
	1369.45	74.44	73.34
	1458.34	42.31	57.34
	1765.43	77.63	63.82
60 min	1621.34	56.34	73.22
	1786.33	89.54	46.24
	1576.3	34.53	94.53
	1592.42	67.34	93.63
75 min	1742.12	53.53	57.34
	1636.34	86.34	46.37
	1645.64	94.42	66.52
	1721.41	26.73	93.42
90 min	1735.23	45.73	85.35
	1683.42	85.34	35.73
	1674.23	36.42	46.43
	1714.22	24.64	74.2
120 min	1702.35	52.66	35.72
	1745.23	95.42	73.24
	1676.23	42.52	84.24
	1723.12	35.24	62.23

## Sheet: Table S3
Table S3 The original data of change in the absorbance value of MB under the photocatalytic activity of TiO2-B＠anatase NWs at each selected time
wavelength/time	0 min	15 min	30 min	45 min	60 min	75 min	90 min	120 min
525	0.067	0.06	0.065	0.036	0.067	0.023	0.016	0.011
526	0.08	0.0614	0.078	0.064	0.035	0.024	0.026	0.021
527	0.075	0.07	0.069	0.067	0.059	0.038	0.029	0.009
528	0.08	0.0688	0.0683	0.054	0.045	0.0234	0.0198	0.0184
529	0.07	0.06	0.068	0.055	0.057	0.009	0.0026	0.0092
530	0.07	0.072	0.054	0.065	0.045	0.0233	0.014	0.009
531	0.072	0.065	0.059	0.054	0.046	0.022	0.0139	0.0033
532	0.067	0.06	0.065	0.036	0.067	0.022	0.026	0.018
533	0.08	0.0614	0.078	0.064	0.035	0.0172	0.0062	0.0043
534	0.06	0.061	0.065	0.057	0.054	0.0204	0.013	0.0084
535	0.072	0.066	0.05	0.037	0.036	0.0239	0.0174	0.0107
536	0.07	0.068	0.065	0.047	0.046	0.024	0.032	0.014
537	0.074	0.069	0.067	0.065	0.053	0.0204	0.0161	0.0067
538	0.071	0.063	0.058	0.046	0.033	0.0197	0.0141	0.0065
539	0.069	0.047	0.041	0.052	0.033	0.0196	0.0173	0.0098
540	0.067	0.05	0.043	0.054	0.03	0.021	0.0105	0.0087
541	0.065	0.053	0.046	0.064	0.053	0.0243	0.0137	0.0124
542	0.068	0.055	0.047	0.053	0.037	0.027	0.013	0.01
543	0.069	0.058	0.056	0.062	0.053	0.0178	0.0166	0.01
544	0.069	0.06	0.055	0.036	0.067	0.021	0.0184	0.011
545	0.072	0.0614	0.058	0.064	0.035	0.0235	0.0221	0.019
546	0.072	0.06	0.055	0.036	0.067	0.0237	0.0202	0.0122
547	0.073	0.061	0.055	0.057	0.054	0.0239	0.0132	0.0124
548	0.075	0.065	0.057	0.053	0.037	0.0241	0.0164	0.0162
549	0.08	0.068	0.054	0.065	0.045	0.0264	0.0188	0.0131
550	0.082	0.076	0.059	0.054	0.046	0.0208	0.0171	0.0164
551	0.085	0.077	0.056	0.064	0.053	0.0169	0.0161	0.0084
552	0.094	0.09	0.082	0.051	0.043	0.023	0.016	0.011
553	0.0933	0.088	0.088	0.0523	0.035	0.024	0.026	0.021
554	0.097	0.0848	0.0881	0.052	0.044	0.038	0.029	0.009
555	0.1046	0.1001	0.0894	0.0536	0.0413	0.0234	0.0198	0.0184
556	0.1055	0.0986	0.0959	0.0594	0.0584	0.009	0.0026	0.0092
557	0.1127	0.094	0.095	0.059	0.057	0.0233	0.014	0.009
558	0.1139	0.1	0.09	0.06	0.057	0.022	0.0139	0.0033
559	0.1179	0.0967	0.0953	0.0645	0.0598	0.022	0.026	0.018
560	0.1261	0.1008	0.1026	0.0682	0.0537	0.0172	0.0062	0.0043
561	0.1287	0.1031	0.1013	0.07	0.0584	0.0204	0.013	0.0084
562	0.1281	0.1075	0.1043	0.065	0.0587	0.0239	0.0174	0.0107
563	0.1363	0.117	0.105	0.0698	0.061	0.024	0.022	0.014
564	0.1364	0.119	0.106	0.071	0.068	0.0204	0.0161	0.0067
565	0.1439	0.111	0.108	0.064	0.061	0.0197	0.0141	0.0065
566	0.1504	0.115	0.11	0.072	0.065	0.0196	0.0173	0.0098
567	0.1535	0.119	0.107	0.0723	0.0635	0.021	0.0105	0.0087
568	0.158	0.123	0.114	0.078	0.061	0.0243	0.0137	0.0124
569	0.1637	0.1199	0.1164	0.0735	0.057	0.027	0.013	0.01
570	0.1667	0.1271	0.1179	0.078	0.061	0.0178	0.0166	0.01
571	0.1709	0.1309	0.119	0.077	0.061	0.021	0.0184	0.011
572	0.1748	0.1262	0.1178	0.0818	0.065	0.0235	0.0221	0.019
573	0.1755	0.1279	0.1235	0.0803	0.0599	0.0237	0.0202	0.0122
574	0.1779	0.1302	0.1242	0.081	0.06	0.0239	0.0132	0.0124
575	0.1875	0.1362	0.1253	0.0856	0.0599	0.0241	0.0164	0.0162
576	0.1927	0.1359	0.1269	0.0853	0.0591	0.0264	0.0188	0.0131
577	0.1985	0.1367	0.1265	0.0856	0.0609	0.0208	0.0171	0.0164
578	0.1937	0.1364	0.1244	0.0771	0.0589	0.0169	0.0161	0.0084
579	0.2034	0.1468	0.1254	0.0847	0.0598	0.014	0.0113	0.0107
580	0.2111	0.1394	0.1287	0.0888	0.0643	0.0171	0.0154	0.0139
581	0.2193	0.14	0.132	0.09	0.0648	0.0199	0.0168	0.0157
582	0.2273	0.1465	0.1345	0.0931	0.0577	0.0198	0.0162	0.0133
583	0.2419	0.155	0.1404	0.0959	0.0597	0.02	0.0174	0.0166
584	0.2481	0.1582	0.1405	0.1004	0.0593	0.0211	0.0207	0.0173
585	0.2536	0.1731	0.1438	0.0982	0.059	0.0152	0.0129	0.0109
586	0.2674	0.163	0.1483	0.0946	0.0635	0.0248	0.021	0.0138
587	0.278	0.1653	0.1516	0.1045	0.06033	0.0251	0.0221	0.0164
588	0.2838	0.1606	0.1495	0.1029	0.0518	0.0224	0.02	0.0141
589	0.298	0.1726	0.1507	0.1037	0.0539	0.0242	0.0241	0.011
590	0.3123	0.1808	0.1568	0.1111	0.0577	0.0309	0.0292	0.0256
591	0.318	0.178	0.157	0.111	0.06	0.0291	0.0253	0.01737
592	0.33	0.1872	0.1639	0.111	0.0637	0.0302	0.0227	0.0236
593	0.3396	0.1946	0.1647	0.1168	0.065	0.031	0.02487	0.01677
594	0.3439	0.1965	0.1643	0.114	0.064	0.032	0.0201	0.0199
595	0.3646	0.199	0.172	0.118	0.0635	0.0376	0.0226	0.0206
596	0.365	0.196	0.171	0.121	0.059	0.0356	0.0291	0.0213
597	0.3782	0.1982	0.1703	0.1202	0.0554	0.0392	0.0243	0.019
598	0.3828	0.2063	0.1572	0.1169	0.0557	0.0334	0.0215	0.0142
599	0.4003	0.2066	0.1744	0.1194	0.062	0.0405	0.0231	0.0163
600	0.4035	0.2123	0.177	0.1227	0.0624	0.0384	0.0207	0.0202
601	0.4135	0.206	0.1811	0.1241	0.0632	0.0416	0.0176	0.0132
602	0.4258	0.2117	0.1821	0.1228	0.0575	0.0385	0.021	0.017
603	0.4394	0.2217	0.1843	0.1288	0.0576	0.0435	0.0274	0.0152
604	0.4503	0.2205	0.1893	0.1289	0.0543	0.0476	0.0201	0.0162
605	0.4591	0.2275	0.1897	0.1282	0.0574	0.0442	0.0227	0.0159
606	0.4768	0.2301	0.1913	0.1305	0.0546	0.0429	0.0225	0.0215
607	0.4832	0.2361	0.1963	0.1351	0.061	0.0483	0.0243	0.0132
608	0.5032	0.2416	0.1999	0.1403	0.0692	0.0535	0.0218	0.0194
609	0.5098	0.2406	0.1993	0.1363	0.0677	0.0537	0.0237	0.0196
610	0.5068	0.2417	0.2013	0.1415	0.0672	0.0532	0.0205	0.018
611	0.5211	0.2511	0.2079	0.1371	0.0624	0.0569	0.0177	0.0172
612	0.5248	0.253	0.2052	0.1412	0.066	0.057	0.02	0.0196
613	0.5298	0.2535	0.2046	0.1409	0.064	0.057	0.019	0.019
614	0.5306	0.2639	0.2111	0.1448	0.067	0.0559	0.0253	0.0225
615	0.5301	0.2466	0.2061	0.1411	0.0544	0.0539	0.021	0.015
616	0.5424	0.2547	0.2097	0.1448	0.0586	0.0565	0.0257	0.0203
617	0.5396	0.25	0.2106	0.1442	0.058	0.0539	0.0176	0.0142
618	0.5371	0.2583	0.2079	0.1471	0.0595	0.0561	0.0196	0.0148
619	0.5438	0.2586	0.2154	0.1484	0.061	0.0578	0.025	0.019
620	0.5402	0.2631	0.2148	0.1487	0.0616	0.0599	0.023	0.0177
621	0.542	0.2619	0.2123	0.1478	0.0609	0.065	0.0277	0.0168
622	0.5402	0.2661	0.2177	0.1439	0.0625	0.0592	0.0191	0.0161
623	0.5469	0.2713	0.2213	0.1506	0.0626	0.0624	0.0258	0.0249
624	0.5405	0.269	0.217	0.1449	0.0617	0.059	0.0159	0.0156
625	0.5485	0.2693	0.219	0.1541	0.0659	0.0637	0.0238	0.02
626	0.5452	0.2687	0.2198	0.1566	0.0652	0.065	0.0206	0.0169
627	0.5551	0.2753	0.2184	0.1483	0.0616	0.0605	0.0206	0.0186
628	0.5561	0.2653	0.2233	0.1514	0.0662	0.0553	0.0242	0.0238
629	0.5609	0.2692	0.2206	0.1548	0.0637	0.0529	0.0204	0.0173
630	0.5663	0.2715	0.2246	0.1575	0.0681	0.0589	0.0175	0.0145
631	0.5727	0.2739	0.2224	0.157	0.0686	0.0593	0.0178	0.0172
632	0.5723	0.277	0.228	0.1526	0.0678	0.0542	0.0202	0.0168
633	0.5885	0.2787	0.2281	0.1554	0.0724	0.0604	0.0213	0.0157
634	0.5925	0.2814	0.2255	0.1489	0.0691	0.0555	0.0197	0.0154
635	0.5969	0.2867	0.2292	0.1572	0.0732	0.0586	0.0206	0.0198
636	0.6078	0.2934	0.23	0.1537	0.0735	0.0608	0.0188	0.0155
637	0.6189	0.2976	0.2333	0.1528	0.0775	0.0655	0.0188	0.0172
638	0.6303	0.2967	0.2334	0.1536	0.078	0.0651	0.0191	0.0173
639	0.64	0.298	0.2328	0.1565	0.0772	0.0636	0.0201	0.0139
640	0.6484	0.3028	0.2326	0.1541	0.0821	0.0629	0.0212	0.0155
641	0.6646	0.3049	0.2337	0.1583	0.0825	0.0593	0.0184	0.0161
642	0.6673	0.3015	0.2365	0.1569	0.0857	0.057	0.0162	0.0142
643	0.6767	0.3071	0.2395	0.1594	0.0861	0.0587	0.0187	0.0153
644	0.6896	0.3093	0.2389	0.1576	0.0874	0.0609	0.0168	0.0155
645	0.7224	0.3166	0.2413	0.1631	0.0953	0.06	0.0173	0.0171
646	0.7323	0.3198	0.2365	0.1532	0.09	0.0643	0.0179	0.0161
647	0.7544	0.322	0.2415	0.1561	0.0947	0.0639	0.0199	0.0135
648	0.7729	0.3327	0.2449	0.1628	0.1004	0.0661	0.0176	0.0154
649	0.7906	0.3367	0.2457	0.1589	0.1031	0.0596	0.0189	0.0162
650	0.8039	0.3351	0.2443	0.1583	0.1053	0.0652	0.0184	0.0155
651	0.8218	0.3401	0.2487	0.1621	0.1061	0.06834	0.0204	0.0142
652	0.8383	0.3391	0.2443	0.1606	0.1104	0.0634	0.0237	0.014
653	0.8532	0.3404	0.2424	0.1574	0.1092	0.0568	0.017	0.0116
654	0.8763	0.3495	0.2435	0.1529	0.1133	0.056	0.0198	0.012
655	0.8954	0.3452	0.2433	0.1589	0.1161	0.0594	0.0173	0.0112
656	0.9102	0.3429	0.2403	0.1547	0.1204	0.0598	0.0205	0.015
657	0.9218	0.3402	0.2435	0.1509	0.1182	0.0567	0.0156	0.0148
658	0.9282	0.3406	0.2408	0.1594	0.1206	0.0594	0.013	0.0112
659	0.9305	0.3385	0.2334	0.1548	0.1186	0.0618	0.016	0.0133
660	0.9385	0.3384	0.2328	0.1595	0.1199	0.0595	0.0115	0.0106
661	0.9435	0.3432	0.2335	0.149	0.1227	0.061	0.0172	0.0146
662	0.9488	0.3411	0.2338	0.1563	0.1248	0.0613	0.0168	0.0144
663	0.9513	0.3488	0.2303	0.1532	0.1229	0.0653	0.0143	0.0136
664	0.9551	0.3479	0.2386	0.1582	0.1226	0.0643	0.0161	0.0154
665	0.9515	0.3321	0.2232	0.1425	0.1243	0.0613	0.0183	0.0132
666	0.9474	0.3281	0.2237	0.1397	0.1241	0.0604	0.0128	0.0112
667	0.9393	0.3251	0.2137	0.1273	0.12	0.0687	0.0125	0.009
668	0.9307	0.316	0.208	0.1292	0.1159	0.0564	0.0109	0.0036
669	0.9189	0.3102	0.2016	0.127	0.1178	0.0551	0.0106	0.0072
670	0.9027	0.3008	0.2038	0.125	0.1147	0.0583	0.011	0.0121
671	0.883	0.2987	0.1988	0.1193	0.1161	0.0611	0.0182	0.0098
672	0.861	0.2919	0.1867	0.1107	0.1075	0.0626	0.0134	0.0119
673	0.8277	0.2788	0.1792	0.1085	0.105	0.062	0.0162	0.0087
674	0.7989	0.2709	0.1763	0.1031	0.1021	0.0589	0.0166	0.0135
675	0.7607	0.2559	0.1661	0.0983	0.0956	0.0598	0.0146	0.0086
676	0.7206	0.2442	0.161	0.0942	0.0917	0.0622	0.0126	0.0121
677	0.6836	0.2367	0.1522	0.0869	0.0815	0.0637	0.0148	0.0119
678	0.6372	0.2199	0.1401	0.0829	0.0782	0.0614	0.0181	0.0107
679	0.5951	0.2068	0.131	0.0785	0.0713	0.0608	0.0126	0.012
680	0.56	0.1912	0.1218	0.0691	0.0638	0.0564	0.0063	0.0062
681	0.5268	0.1825	0.1174	0.0719	0.064	0.0564	0.012	0.007
682	0.4855	0.1698	0.1087	0.0632	0.0529	0.0525	0.0054	0.0019
683	0.4601	0.1608	0.106	0.0613	0.0589	0.0477	0.0096	0.0035
684	0.4356	0.1486	0.0992	0.0538	0.0597	0.0469	0.0066	0.0021
685	0.4071	0.1428	0.0934	0.0605	0.0512	0.0417	0.008	0.0069
686	0.3871	0.1407	0.0908	0.0634	0.0545	0.042	0.0107	0.0061
687	0.367	0.1361	0.087	0.0578	0.0513	0.0365	0.0099	0.0086
688	0.333	0.1296	0.0835	0.0645	0.0468	0.0325	0.0121	0.01
689	0.3188	0.1234	0.0811	0.0652	0.0431	0.035	0.0126	0.0121
690	0.2929	0.1155	0.077	0.068	0.0414	0.0305	0.0096	0.0088
691	0.2701	0.1124	0.0733	0.0668	0.0389	0.0274	0.0118	0.0115
692	0.2485	0.1027	0.064	0.065	0.035	0.021	0.0131	0.0101
693	0.2255	0.0916	0.0614	0.0599	0.0328	0.0172	0.0091	0.0077
694	0.2039	0.0845	0.0571	0.0586	0.0364	0.0133	0.0112	0.0031
695	0.1869	0.0787	0.0531	0.0488	0.0326	0.0125	0.0084	0.0031
696	0.164	0.075	0.0575	0.0514	0.0257	0.0101	0.0081	0.0049
697	0.1441	0.0682	0.0562	0.049	0.0275	0.0066	0.0036	0.0026
698	0.1293	0.0627	0.0583	0.0457	0.0203	0.007	0.0058	0.0013
699	0.1111	0.0611	0.0547	0.0368	0.0175	0.0011	0.008	0.0069
700	0.0978	0.0532	0.0538	0.0361	0.0137	0.004	0.0107	0.0061
701	0.0853	0.0606	0.053	0.0343	0.0172	0.0093	0.0099	0.0086
702	0.081	0.046	0.0611	0.0328	0.0156	0.0104	0.0121	0.01
703	0.0754	0.0578	0.0455	0.0317	0.0162	0.0051	0.0126	0.0121
704	0.0665	0.0563	0.0456	0.0325	0.0176	0.0056	0.0096	0.0088
705	0.0647	0.0629	0.0427	0.0307	0.01533	0.0099	0.0118	0.0115
706	0.0612	0.0567	0.0439	0.0278	0.0126	0.0087	0.0131	0.0101
707	0.06	0.0432	0.037	0.027	0.01	0.009	0.0091	0.0077
708	0.0595	0.0499	0.0387	0.0254	0.0098	0.0043	0.0112	0.0031
709	0.055	0.046	0.039	0.0263	0.0088	0.007	0.0084	0.0031
710	0.0464	0.0699	0.0436	0.0508	0.0227	0.048	0.009	0.0026
711	0.0401	0.0727	0.048	0.0424	0.0207	0.0508	0.008	0.0069
712	0.0391	0.0583	0.0406	0.0558	0.0198	0.0239	0.0107	0.0061
713	0.0427	0.029	0.032	0.0452	0.0256	0.029	0.0099	0.0086
714	0.0391	0.0162	0.0453	0.0573	0.0213	0.0461	0.0121	0.01
715	0.0535	0.0635	0.053	0.04	0.0306	0.0327	0.0126	0.0121
716	0.059	0.0684	0.0468	0.0454	0.038	0.031	0.0096	0.0088
717	0.054	0.065	0.046	0.048	0.039	0.035	0.0118	0.0115
718	0.0427	0.029	0.032	0.0452	0.0256	0.029	0.0131	0.0101
719	0.0391	0.0162	0.0453	0.0573	0.0213	0.0461	0.0091	0.0077
720	0.0401	0.0727	0.048	0.0424	0.0207	0.0508	0.0112	0.0031
721	0.0391	0.0583	0.0406	0.0558	0.0198	0.0239	0.0084	0.0031
722	0.0427	0.029	0.032	0.0452	0.0256	0.029	0.0096	0.0088
723	0.0391	0.0162	0.0453	0.0573	0.0213	0.0461	0.0118	0.0115
724	0.0535	0.0635	0.053	0.04	0.0306	0.0327	0.0131	0.0101
725	0.059	0.0684	0.0468	0.0454	0.038	0.031	0.0091	0.0077

## Sheet: Table S4
Table S4 The original data of change in the normalized concentration (C/C0) of MB with irradiation time (four samples of each group in the corresponding time interval)
Time/C/C0	NWs+UV	NWs	UV
0 min	1	1	1
	1	1	1
	1	1	1
	1	1	1
15 min	0.376	0.946	0.925
	0.369	0.921	0.954
	0.341	0.962	0.941
	0.352	0.981	0.949
30 min	0.321	0.966	0.935
	0.278	0.924	0.954
	0.271	0.898	0.912
	0.301	0.977	0.933
45 min	0.274	0.993	0.951
	0.229	0.929	0.937
	0.218	0.945	0.945
	0.272	0.899	0.919
60 min	0.213	0.978	0.925
	0.179	0.943	0.964
	0.191	0.912	0.928
	0.22	0.942	0.947
75 min	0.165	0.977	0.926
	0.132	0.934	0.947
	0.129	0.951	0.929
	0.157	0.922	0.927
90 min	0.089	0.936	0.943
	0.017	0.952	0.923
	0.076	0.929	0.952
	0.153	0.983	0.937
120 min	0.034	0.987	0.974
	0.051	0.946	0.972
	0.029	0.962	0.932
	0.048	0.939	0.921

## Sheet: Table S5
Table S5 The original data of changes in the XPS profile for C 1s
Binding energy/Counts	SLA	NWs-SLA	UV-SLA	NWs+UV-SLA
291.4	1175.61	1045.83	1147.48	1054.31
291.35	1234.93	1101.93	1145.75	1089.42
291.3	1283.35	1163.12	1221.46	1153.35
291.25	1286.69	1087.03	1184.67	1053.52
291.2	1173.67	1219.06	1135.21	1201.54
291.15	1257.74	1274.01	1134.52	1266.42
291.1	1199.94	1176.26	1237.97	1158.42
291.05	1203.15	1139.66	1277.39	1124.45
291	1283.97	1181.61	1164.93	1155.52
290.95	1311.58	1158.74	1145.79	1148.37
290.9	1231.68	1096.69	1187.1	1068.87
290.85	1310.36	1229.37	1148.12	1202.41
290.8	1263.56	1195.68	1164.26	1178.37
290.75	1256.42	1189.4	1187.77	1168.41
290.7	1211.81	1158.7	1183.63	1146.72
290.65	1232.48	1239.98	1140.66	1210.42
290.6	1237.33	1186.31	1164.31	1146.87
290.55	1117.42	1179.86	1185.85	1168.31
290.5	1155.84	1131.09	1275.15	1121.31
290.45	1253.67	1126.67	1250.87	1121.14
290.4	1177.96	1116.14	1277.82	1101.31
290.35	1266.38	1069.28	1222.55	1035.53
290.3	1350.16	1155.65	1137.48	1124.52
290.25	1327.88	1201.46	1248.84	1181.53
290.2	1283.76	1137.35	1248.6	1132.42
290.15	1277.37	1170.56	1274.99	1157.33
290.1	1309.44	1166.53	1132.07	1138.52
290.05	1383.9	1161.25	1256.98	1145.63
290	1325.47	1127.57	1332.28	1123.51
289.95	1287.56	1242.4	1319.3	1223.52
289.9	1270.19	1251.83	1352.11	1226.45
289.85	1385.56	1234.38	1289.59	1213.13
289.8	1332.93	1172.65	1306.33	1164.28
289.75	1401.42	1278.96	1361.23	1274.2
289.7	1410.24	1267.42	1351.29	1254.38
289.65	1499.7	1269.52	1366.88	1253.54
289.6	1527.83	1422.33	1335.25	1413.41
289.55	1355.92	1371.33	1431.18	1364.43
289.5	1507.82	1269.72	1481.62	1265.53
289.45	1599.47	1495.3	1586.44	1488.33
289.4	1535.11	1502.68	1607.41	1492.46
289.35	1523.83	1329	1434.67	1323.31
289.3	1480.86	1430.6	1517.63	1424.53
289.25	1603.01	1469.98	1656.1	1456.53
289.2	1752.89	1498.41	1628.11	1487.53
289.15	1653.91	1567.41	1624.39	1555.4
289.1	1702.26	1481.7	1636.3	1473.73
289.05	1719.86	1605.43	1541.93	1575.53
289	1885.49	1697.69	1614.01	1688.6
288.95	1792.09	1626.44	1753.1	1614.64
288.9	1734.23	1731.01	1762.27	1713.99
288.85	1663.67	1603.71	1834.75	1593.41
288.8	1886.29	1714.21	1719.5	1701.31
288.75	1917.36	1712.73	1716.03	1701.42
288.7	1880.11	1651.96	1735.33	1653.82
288.65	1852.34	1588.86	1755.47	1576.57
288.6	1864.19	1637.04	1698.47	1618.42
288.55	1783.55	1670.75	1846.05	1642.64
288.5	1820.76	1799.74	1827.52	1778.42
288.45	1968.63	1702.15	1860.1	1687.63
288.4	1990.04	1786.94	1640.48	1753.78
288.35	1895.21	1806.88	1751.72	1789.53
288.3	1927.28	1825.95	1756.46	1801.78
288.25	1974.73	1702.04	1733.32	1686.46
288.2	2023.37	1694.37	1766.5	1675.57
288.15	2018.34	1709.15	1723.71	1689.12
288.1	1980.79	1696.68	1743.67	1688.33
288.05	1856.05	1734.45	1745.56	1732.81
288	1807.89	1811.11	1736.89	1802.55
287.95	1734.49	1766.95	1753.61	1745.42
287.9	1814.85	1780.94	1707.66	1753.85
287.85	1824.99	1712.54	1712.38	1702.92
287.8	1819.32	1637.86	1652.26	1628.31
287.75	1790.46	1617.37	1648.88	1601.33
287.7	1772.77	1708	1811.3	1698.31
287.65	1728.28	1749.16	1705.75	1731.01
287.6	1823.55	1570.24	1784.11	1563.91
287.55	1805.49	1612.53	1793.45	1600.66
287.5	1687.86	1643.41	1773.77	1643.41
287.45	1803.33	1695.64	1779.16	1687.22
287.4	1864.52	1703.1	1772.21	1673.42
287.35	1869.87	1672.11	1918.32	1665.12
287.3	1930.96	1698.84	1911.68	1676.42
287.25	1923.67	1830.49	1929.97	1822.72
287.2	1917.6	2000.85	1925.14	1978.24
287.15	2047.76	1847.12	2012.39	1831.41
287.1	2218.92	1774.47	2157.65	1731.42
287.05	2460.49	2021.48	2146.39	2031.42
287	2337.24	2082.05	2178.25	2042
286.95	2330.21	2128.79	2293.33	2118.41
286.9	2452.6	2117.12	2454.09	2101.54
286.85	2564.37	2351.57	2437.07	2342.82
286.8	2670.6	2473.48	2525.78	2445.52
286.75	2698.7	2577.65	2723.43	2524.52
286.7	2799.97	2652.77	2773.83	2642.75
286.65	2789.87	2666.07	2731.73	2653.52
286.6	2990.84	2987.61	2898.65	2787.66
286.55	3123.83	2995.77	3046.99	2795.25
286.5	3318.34	3034.13	2976.23	2634.53
286.45	3345.67	3164.49	2898.62	2694.52
286.4	3316.62	3229.54	2953.44	2729.52
286.35	3380.81	3202.01	3029.68	2702.02
286.3	3334.76	3247.71	2966.02	2747.54
286.25	3556.46	3289.37	3035.39	2789.32
286.2	3641.46	3330.11	3152.14	2790.42
286.15	3608.34	3444.07	3196.4	2844.52
286.1	3714.99	3502.02	3106.19	2802.73
286.05	3681.82	3551.28	3055.89	2821.29
286	3886.74	3554.71	3065.93	2954.27
285.95	4187.63	3793.54	3086.64	2863.24
285.9	4434.38	3992.66	3133.08	2892.18
285.85	4551.44	4186.71	3300.82	2886.24
285.8	4473.29	4281.3	3443.76	2941.41
285.75	4820.68	4420.9	3663.93	2952.51
285.7	4890.36	4414.96	3823.32	3114.42
285.65	5096.39	4824.67	4080.82	3224.45
285.6	5326	5037.05	4046.13	3402.01
285.55	5550.06	5205.24	4243.01	3527.71
285.5	6143.4	5461.54	4220.1	3700.37
285.45	6486.87	5641.04	4792.28	3790.11
285.4	6960.62	6236.46	5409.56	3894.07
285.35	7203.81	6698.82	5559.33	4062.02
285.3	7865.29	7406.11	5896.53	4000.28
285.25	8089.46	7856.28	6279.34	4404.71
285.2	8279.2	8036.83	6538.38	4533.54
285.15	8788	8059.63	6710.72	4762.66
285.1	9266.47	8679.76	7028.43	4806.71
285.05	9423.31	8844.55	7281.34	4921.3
285	10046.8	9256.55	7562.96	5120.9
284.95	10262.1	9666.09	7584.35	5314.96
284.9	10637.5	10125	7771.7	5224.67
284.85	10944	10457.8	7983.07	5396
284.8	10706.3	10612.8	7867.66	5444.81
284.75	11073.1	10460.5	7814.26	5355.08
284.7	10824.1	10528.5	7708.94	5222.82
284.65	10499.1	9815.04	7511.45	5161.65
284.6	10330.1	9489.99	7505.69	4956.37
284.55	9807.09	9034.21	7041.86	4726.71
284.5	9348.54	8711.18	6772.26	4520.32
284.45	9124.47	8273.02	6366.51	4237.86
284.4	8430.44	7880.94	6196.29	4137.64
284.35	7770.98	7408.85	5603.28	3901.83
284.3	7559.78	7076.61	5305.08	3762.46
284.25	6939.21	6436.67	5092.82	3526.79
284.2	6399.62	5857.91	4761.65	3267.97
284.15	5571.94	5471.85	4256.37	3026.93
284.1	5013.37	5161.28	3926.71	2936.87
284.05	4612.74	4691.64	3720.32	2771.16
284	4035.02	4390.76	3487.86	2555.85
283.95	3691.88	3036.86	3187.64	2506.86
283.9	3341	2710.08	2901.83	2310.08
283.85	3111.39	2576.34	2742.46	2176.34
283.8	2592.14	2312.01	2606.79	2012.02
283.75	2580.38	2017.45	2420.97	1817.4
283.7	2116.32	1912.11	2116.93	1712.21
283.65	1968.85	1759.76	2016.87	1559.72
283.6	1893.73	1688.93	1878.16	1608.23
283.55	1631.42	1511.85	1735.85	1427.82
283.5	1732.04	1523.47	1745.58	1501.41
283.45	1634.41	1400.59	1532.36	1330.31
283.4	1549.07	1338.9	1392.72	1301.28
283.35	1350.2	1322.79	1339.72	1301.28
283.3	1341.34	1323.81	1415.37	1273.19
283.25	1253.69	1180.1	1332.66	1160.11
283.2	1352.89	1136.42	1286.27	1116.72
283.15	1255.16	1199.98	1200.18	1179.17
283.1	1266.39	1235.31	1163.19	1215.1
283.05	1303.83	1077.74	1213.73	1065.34
283	1205.54	1031.2	1253.43	1027.24
282.95	1214.37	1161.52	1305.8	1154.28
282.9	1137.62	1133.33	1203.38	1128.81
282.85	1168.32	1212.42	1208.37	1200.37
282.8	1125.97	1174.09	1077.04	1137.82
282.75	1176.63	1162.67	1038.3	1127.24
282.7	1171.94	1182.84	1112.06	1158.13
282.65	1118.9	1139.35	1093.75	1128.31
282.6	1195.95	1161.49	1020.92	1061.34
282.55	1161.82	1169.52	1111.71	1138.38
282.5	1219.88	1092.5	1124.67	1062.56
282.45	1155.52	1127.56	1161.04	1098.48
282.4	1142.28	1117.89	1122.93	1089.8
282.35	1086.61	1094.5	1078.86	1076.73
282.3	1097.29	1041.01	1146.97	1032.98
282.25	1106.06	1062.63	1145	1045.28
282.2	1125.99	1064.67	1148.64	1055.35
282.15	1094.28	1048.88	1129.24	1076.38
282.1	1153.65	1057.51	1031.48	1028.42
282.05	1115.29	1090.71	1041.65	1074.25
282	1026.49	1118.82	1082.95	1134.26
281.95	1093.78	1083.12	1072.43	1063.34
281.9	1119.25	1087.91	1016.15	1057.54
281.85	1087.39	999.456	1084.15	987.74
281.8	1120.37	1081.76	1197.54	1041.53
281.75	1064.03	1034.08	1131.17	1013.31
281.7	1028.08	1121.26	1031.77	1131.42
281.65	1002.19	1032.38	978.551	1026.17
281.6	1072.77	1033.57	1016.57	1037.82
281.55	1107.8	1095.27	1049.38	1084.24
281.5	1104.6	1053.67	972.341	1038.74
281.45	1094.28	1057.96	1057.43	1042.63
281.4	1178.76	1114.11	1180.78	1125.61
281.35	1056.93	1040.32	1028.64	1024.52
281.3	1110.22	1055.13	1112.78	1035.63
281.25	1055.94	974.95	1039.68	957.53
281.2	1150.36	1010.85	1023.27	1000.74
281.15	1151.34	1099.19	1055.19	1029.42
281.1	1215.93	1181.91	1084.18	1080.41
281.05	1098.2	1071.34	1085.07	1045.52
281	1121.82	1066.67	1078.59	1035.52
280.95	1152.32	1009.67	1086.56	979.42
280.9	1113.28	1102.7	1264.99	992.72
280.85	1060.71	1069.93	1166.51	1064.35
280.8	1073.9	996.735	974.662	987.84
280.75	1155.85	1026.78	1027.69	1042.41
280.7	1177.85	957.695	1179.64	934.52
280.65	1001.81	986.779	1093.4	932.38
280.6	1030.76	1002.77	1004.03	982.42
280.55	1050.24	1079.09	983.978	1074.28

## Sheet: Table S6
Table S6 The original data of changes in the XPS profile for O 1s
Binding energy/Counts	SLA	NWs-SLA	UV-SLA	NWs+UV-SLA
535.8	5631.45	5461.32	6093.73	6029.65
535.75	5725.07	5420.1	6181.82	6017.43
535.7	5677.94	5460.66	6083.55	6119.03
535.65	5762.82	5446.56	6092.93	6172.95
535.6	5710.92	5367.76	6118	6239.46
535.55	5679.84	5614.26	6027.96	6145.88
535.5	5593.34	5521.02	6168.69	6209.21
535.45	5709.02	5457.09	6081.18	6216.41
535.4	5701.59	5493.77	6084.98	6248.66
535.35	5638.21	5533.06	6197.78	6304.97
535.3	5831.79	5483.71	6179.66	6320.34
535.25	5536.66	5648.31	6177.06	6364.83
535.2	5643.01	5235.49	6350.36	6452.2
535.15	5604.05	5426.95	5856.93	6000.53
535.1	5621.37	5425.8	6079.14	6211.46
535.05	5532.31	5595.93	6171.04	6361.94
535	5956.8	5608.6	6124.35	6343.34
534.95	5898.54	5410.34	6122.35	6332.26
534.9	5845.44	5463.37	6138.94	6359.58
534.85	5822.18	5751.24	6179.61	6380.38
534.8	5788.78	5410.45	6409.46	6666.96
534.75	5807.35	5469.42	6319.65	6535.31
534.7	5840.9	5600.45	6255.73	6499.9
534.65	5916.65	5617.96	6075.2	6134.76
534.6	5848.69	5816.66	6188.32	6379.21
534.55	5793.41	5453.89	6310	6571.96
534.5	6134.5	5674.01	6524.07	6720.62
534.45	6094.53	5807.3	6435.57	6838.37
534.4	5963.49	5784.11	6627.03	6958.77
534.35	6173.16	5939.03	6498.62	6732.59
534.3	6360.82	5979.88	6769.94	7086.03
534.25	6464.95	6172.1	6626.44	6920.12
534.2	6319.25	6196.61	6811.99	7179.82
534.15	6405.95	5771.81	6688.47	6959.8
534.1	6423.63	5922.75	7104.28	7490.48
534.05	6492.48	6016.36	6941.05	7290.4
534	6784.43	6226.79	6940.74	7241.6
533.95	6642.4	6078.88	7243.07	7654.1
533.9	6911.48	6238.66	7203.17	7679.8
533.85	6908.67	6481.22	7559.44	7875.3
533.8	7055.4	6521.76	7608	7912.5
533.75	7016.93	6798.27	7711.56	8042.5
533.7	6943.35	7068.38	7620.84	7957
533.65	7255.61	7022.57	7853.29	8229.9
533.6	7187.31	7193.89	7839.52	8382.1
533.55	7724.02	7250.02	8009.12	8661
533.5	7821.06	7261.14	8361.28	8764.7
533.45	7959.1	7128.82	8091.27	8480.8
533.4	8026.2	7458.71	8238.7	8682.3
533.35	8204.51	7916.37	8771.43	9125
533.3	8605.91	8012.23	8809.54	9293.3
533.25	8565.55	8008.05	8929.67	9338.9
533.2	8506.65	8319.2	9070.56	9352.8
533.15	8851.73	8326.74	8984.76	9406.8
533.1	8204.13	8220.07	8971.67	9357.2
533.05	8134.17	8181.48	9363.51	9845
533	8804.25	8806.19	9689.35	10003.3
532.95	9001.36	9015.97	9465.47	9902.4
532.9	9081.34	9134.18	9489.28	9966.5
532.85	9408	9474.25	9811	10098.4
532.8	9420.9	9449.81	9691.91	10087.2
532.75	9428.2	9452.42	9583.24	9945.3
532.7	9183.2	9229.68	9870.6	10196.1
532.65	9566.1	9603.67	9590.36	9973.4
532.6	9763.5	9808.29	9847.01	9949.7
532.55	9980.5	10013.3	9929.12	10281.9
532.5	10078	10118.2	9999.04	10205.2
532.45	9905.7	9968.93	10126.6	10377.5
532.4	9985.9	10013.4	9752.43	10028.6
532.35	10135.4	10162.8	10063	10381.8
532.3	10384.7	10407.6	10456.8	10839.2
532.25	10009.6	10024.9	10053.3	10399.4
532.2	10001.8	10047.1	10388.8	10663.2
532.15	10304.2	10330.5	10521.1	10857
532.1	10319.2	10373.7	10575.9	10831.4
532.05	10115.3	10190.7	10702.9	11177.2
532	10000.2	10022.1	10758.6	11192.3
531.95	10061.3	10107.1	10781	11294.5
531.9	10529.5	10617.5	10812.4	11083.8
531.85	10008.7	10014.1	10567.5	10809
531.8	10152.1	10220.9	10978.9	11399.9
531.75	10063.9	10157.2	10863.7	11072.7
531.7	10247.9	10391.1	11396.1	11698.6
531.65	10120.7	10164	11199.4	11565.9
531.6	9925.3	9948.41	11369.7	12028.4
531.55	10375.6	10390.9	11373.1	11845.7
531.5	10266.8	10336.6	11772.8	12276.6
531.45	10079.4	10091.1	12430.8	12837.2
531.4	10007	10026.9	12625	13175.1
531.35	10069.5	10113.4	12662.4	13077.9
531.3	9923.76	10391.6	13032.7	13670.3
531.25	10358.7	10385.2	13469.3	14962.2
531.2	10308.6	10246.7	13726.1	15408.3
531.15	10362.5	10767.3	14330.4	15758.9
531.1	10200.5	10842.1	15303	16934.4
531.05	10986.3	11310.3	16050.6	17510.5
531	11040.5	11433.9	16961.3	18696.3
530.95	11353.4	11945.7	17550.7	19070.9
530.9	11831.8	12304.6	18293	20962.3
530.85	12241	13145.7	18949.8	22187.4
530.8	12638.8	13503.1	20445.1	22979.3
530.75	12933.3	13969.8	21295.8	23539.9
530.7	13269.8	14935.5	22079.3	24426.4
530.65	14151.3	15569	22939.5	25679.3
530.6	14897.3	16183.7	23833.4	26227.5
530.55	15421.5	16668.4	24395	26930.5
530.5	15783.9	17409.7	24991.3	27849
530.45	16661.3	18054.9	25410.8	28882
530.4	17432	18383.6	25927.8	29312.3
530.35	17854.6	18336.1	26155	29738.3
530.3	17985.4	18745.6	26312.3	30203.2
530.25	18341.1	19047.7	26062.8	29679.2
530.2	18381.2	19124.3	25539.8	28805.8
530.15	18978.5	19609.6	25013.4	27490.2
530.1	18482.6	19787	24399.6	26834.2
530.05	18848.5	19536.1	23135.2	25287
530	18791.9	19050	22585.3	24933.8
529.95	18313.9	18840.5	21984.3	23096.7
529.9	17881.6	18029.1	20486.7	22622.1
529.85	16856.6	17345.2	18998.9	21135.6
529.8	16548.6	16883.4	17762.5	18864.1
529.75	15459.2	15484.3	16429.2	17573.5
529.7	14918.8	14644.4	14978.9	16702.9
529.65	14123.2	13991.4	14014	14119
529.6	13296.7	12866.9	12808.4	12891.3
529.55	12379.7	12016.5	11861	11927.1
529.5	11039.1	11353.5	11033.7	11097.8
529.45	10907.3	10919.2	10106.9	10157
529.4	10124.2	9796.16	9377.62	9416.4
529.35	9638.24	9008.53	9061.53	9111.4
529.3	8962.19	8523.6	8394.99	8456.3
529.25	8318.46	7928.26	7992.53	8075.8
529.2	7880.45	7768.61	7493.77	7558.6
529.15	7342.28	7219.94	7000.72	7106.2
529.1	7048.23	6716.16	6724	6803
529.05	6725.63	6464.59	6625.43	6725.8
529	6549.95	6148.28	6302.17	6411.4
528.95	6377.7	5941.86	6039.82	6167.55
528.9	5985.42	5819.69	5933.69	6087.64
528.85	5833.52	5738.92	6050.95	6103.42
528.8	5788.96	5457.83	5921.82	6078.67
528.75	5784.06	5393.26	5849.65	5909.75
528.7	5689.8	5382.97	5644.8	5732.81
528.65	5686.1	5435.41	5590.36	5643.83
528.6	5530.07	5348.49	5691.68	5790.68
528.55	5662.28	5121.33	5797.7	5448.92
528.5	5586.86	5234.17	5566.64	5671.6
528.45	5329.62	5080.59	5361.12	5480.3
528.4	5377.48	5161.06	5400.4	5529.75
528.35	5360.05	5227.24	5281.54	5396.57
528.3	5305	5282.14	5645.99	5741.95
528.25	5299.91	4958.82	5659.4	5740.82
528.2	5205.38	4790.81	5512.38	5642.77
528.15	5125.31	5025.75	5312.77	5469.21
528.1	5244.11	5002.02	5273.57	5338.66
528.05	5098.79	4895.41	5312.93	5456.22
528	5062.95	4723.46	5505.32	5649.16
527.95	5188.4	5003.3	5499.13	5515.25
527.9	5123.03	4695.35	5417.93	5540.71
527.85	5137.49	4740.5	5176.93	5234.17
527.8	5099.77	4910.6	5234.96	5352.44
527.75	5096.26	5078.61	5233.47	5363.25
527.7	5313.97	5089.52	5372.76	5454.92
527.65	5129.04	5068.36	5203.62	5394.42
527.6	5014.85	4905.79	5428.38	5552.65
527.55	4842.83	4963.31	5415.86	5508.77
527.5	4924.8	4979.24	5339.22	5451.08
527.45	5454.58	4870.28	5354.59	5501.96
527.4	5249.54	4887.38	5305.4	5421.49
527.35	4989.85	4775.67	5321.01	5423.85
527.3	5107.92	4789.1	5223.98	5301.72

## Sheet: Table S7
Table S7 The original data of changes in the XPS profile for Ti 2p
Binding energy/Counts	SLA	NWs-SLA	UV-SLA	NWs+UV-SLA
467.6	2831.9	2681.44	2797.03	2897.03
467.55	2763.63	2710.72	2825.03	2925.03
467.5	2962.79	2588.92	2614.55	2714.55
467.45	2839.47	2575.33	2629.27	2729.27
467.4	2861.43	2803.52	2922.35	3022.35
467.35	2778.14	2706.59	2864.85	2964.85
467.3	2884.31	2882.21	2907.46	3007.46
467.25	2848.84	2618.02	2790.74	2890.74
467.2	2826.62	2572.63	2619.32	2719.32
467.15	2853.22	2744.43	2853.09	2953.09
467.1	2805.2	2742.26	2834.49	2934.49
467.05	2839.2	2777.53	2844.51	2944.51
467	2741	2750.68	2804.98	2904.98
466.95	2887.96	2889.6	2943.83	3043.83
466.9	2916.81	2876.29	2916.95	3016.95
466.85	2827.03	2741.67	2890.01	3090.01
466.8	2758.59	2888.66	2993.64	3093.64
466.75	2913.9	2937.33	3048.96	3248.96
466.7	2876.51	2925.89	3046.93	3246.93
466.65	2826.39	2860.46	3040.5	3240.5
466.6	2874.06	3067.19	3178.99	3378.99
466.55	3000.27	2993.98	3050.38	3250.38
466.5	3048.68	3160.94	3226.07	3426.07
466.45	3064.59	3141.45	3283.76	3483.76
466.4	3006.71	3110.25	3221.9	3421.9
466.35	3103.95	3212.37	3379.36	3579.36
466.3	2970.45	2987.05	3173.13	3373.13
466.25	3008.74	2996.25	3155.19	3355.19
466.2	3153.65	3138.55	3351.95	3551.95
466.15	3161.26	3211.54	3482.47	3682.47
466.1	3223.16	3304.2	3561.88	3761.88
466.05	3326.08	3429.98	3604.55	3804.55
466	3371.6	3431.02	3626.67	3826.67
465.95	3309.08	3298.97	3450.63	3650.63
465.9	3453.09	3353.2	3547.09	3747.09
465.85	3579.32	3666.2	3852.9	4052.9
465.8	3575.32	3684.8	3834.66	4034.66
465.75	3600.98	3901.35	4006.46	4206.46
465.7	3713.5	3795.55	4033.41	4233.41
465.65	3915.65	3862.06	4167.26	4367.26
465.6	3809.46	3858.34	4187.12	4387.12
465.55	3794.46	4010.76	4315.11	4615.11
465.5	3820.66	4166.05	4442.04	4742.04
465.45	4072.16	4282.69	4545.44	4845.44
465.4	4149.12	4483.78	4753.93	5153.93
465.35	4394.85	4748.89	5071.06	5471.06
465.3	4663.66	4677.23	5123.56	5523.56
465.25	4733.13	4866.23	5309.53	5709.53
465.2	4654.01	4954.67	5458.05	5858.05
465.15	4661.19	5029.02	5545.45	5945.45
465.1	4954.33	5365.7	5861.32	6261.32
465.05	5169.28	5420.17	6053.36	6453.36
465	5415.03	5714.96	6288.08	6688.08
464.95	5274.81	5698.3	6110.89	6510.89
464.9	5340.76	5671.45	6179.54	6579.54
464.85	5430.03	5716.72	6287	6687
464.8	5571.6	5948.56	6436.28	6836.28
464.75	5564.08	6122.67	6608.73	7008.73
464.7	5401.49	5912.7	6407.27	6807.27
464.65	5665.19	5875.98	6301.65	6801.65
464.6	5518.88	5912.25	6469.12	6869.12
464.55	5621.62	6118.67	6622.75	7022.75
464.5	5774.26	6155.09	6613.13	7013.13
464.45	5689.91	5937.14	6460.41	6860.41
464.4	5628.06	6062.38	6558.77	6958.77
464.35	5827.34	6066.15	6519.16	6919.16
464.3	5579.51	5948.52	6594.72	6994.72
464.25	5408.82	6078.03	6202.81	6602.81
464.2	5470.41	5965.78	6131.68	6531.68
464.15	5865.9	5874.61	6092.68	6492.68
464.1	5645.47	5659.78	5897.63	6297.63
464.05	5548.3	5345.95	5538.19	5838.19
464	5561.73	5350.41	5560.97	5860.97
463.95	5362.74	5288.4	5425.25	5625.25
463.9	5251.62	5200.9	5496.37	5596.37
463.85	5197.15	5087.23	5294.25	5394.25
463.8	5170.53	5078.86	5256.92	5356.92
463.75	4903.45	4994.65	5260.14	5360.14
463.7	4814.57	4997.36	5126.06	5226.06
463.65	4524.47	4710.38	5199.82	5299.82
463.6	4678.06	4530.82	4999.23	5099.23
463.55	4461.94	4502.2	4988.55	5088.55
463.5	4464.39	4605.95	4827.04	4927.04
463.45	4265.08	4058.68	4334.77	4434.77
463.4	4046.69	3956	4171.01	4271.01
463.35	4068.56	3935.77	4289.94	4389.94
463.3	4086.69	3961.31	4242.35	4342.35
463.25	3817.51	3841.7	4005.08	4105.08
463.2	3701.35	3603.6	3890.6	3990.6
463.15	3787.82	3555.69	3786.47	3886.47
463.1	3607.15	3501.48	3736.55	3836.55
463.05	3560.66	3459.32	3569.43	3669.43
463	3340.55	3476.89	3589.44	3689.44
462.95	3301.9	3294.15	3447.24	3547.24
462.9	3282.27	3055.46	3172.42	3272.42
462.85	3083.22	3265.45	3312.19	3412.19
462.8	3218.31	3150.19	3256.46	3356.46
462.75	3155.79	3067.48	3130.96	3230.96
462.7	3055.61	2905.69	3084.04	3184.04
462.65	3072.53	2942.2	3005.73	3105.73
462.6	2936.87	2930.63	3068.82	3168.82
462.55	2831.34	2866.12	2952.58	3052.58
462.5	2727.73	2831.74	2996.96	3096.96
462.45	2936.37	2827.16	2906.38	3006.38
462.4	2917.28	2726.93	2862.98	2962.98
462.35	2584.62	2730.18	2878.05	2978.05
462.3	2732.07	2810.5	2995.39	3095.39
462.25	2800.77	2644.31	2705.22	2805.22
462.2	2666.2	2586.92	2695.97	2795.97
462.15	2685.83	2509.21	2698.29	2798.29
462.1	2699.32	2524.82	2658.46	2758.46
462.05	2744.83	2750.2	2879.51	2979.51
462	2714.22	2564.31	2624.17	2724.17
461.95	2698.2	2502.14	2616.35	2716.35
461.9	2717.28	2652.39	2756.89	2856.89
461.85	2687.97	2494.79	2586.22	2686.22
461.8	2681.22	2493.89	2557.01	2657.01
461.75	2659.46	2559.34	2641.16	2741.16
461.7	2674.25	2587.39	2691.89	2791.89
461.65	2752.12	2579.26	2640.09	2740.09
461.6	2705.93	2476.54	2521.29	2621.29
461.55	2505	2414.01	2579.93	2679.93
461.5	2543.15	2591.16	2681.54	2781.54
461.45	2541.26	2324.75	2455.85	2555.85
461.4	2682.11	2425.79	2583.63	2683.63
461.35	2541.3	2447.49	2513.74	2613.74
461.3	2526.83	2621.34	2714.91	2814.91
461.25	2420.71	2496.97	2516.2	2616.2
461.2	2495.45	2472.56	2583.99	2683.99
461.15	2479.9	2445.06	2556.42	2656.42
461.1	2516.41	2506.79	2686.44	2786.44
461.05	2521.18	2439.89	2598.3	2698.3
461	2426.33	2475.47	2595.65	2695.65
460.95	2796.17	2546.87	2689.48	2789.48
460.9	2653.97	2545.69	2670.28	2770.28
460.85	2586.39	2599.46	2648.06	2848.06
460.8	2626.63	2545.08	2664.43	2864.43
460.75	2551.95	2727.04	2837.11	3037.11
460.7	2732.97	2717.73	2814.89	3014.89
460.65	2699.06	2518.96	2656.43	2856.43
460.6	2574.76	2485.35	2559.49	2759.49
460.55	2689.51	2581	2562.02	2762.02
460.5	2654.58	2454.93	2598.15	2798.15
460.45	2774.17	2570.95	2688.54	2888.54
460.4	2798.91	2549.44	2639.79	2839.79
460.35	2756.89	2642.19	2739.15	2939.15
460.3	2788.01	2694.73	2802.99	3002.99
460.25	2851.52	2798.58	2955.14	3055.14
460.2	2989.84	2828.03	3016.61	3186.61
460.15	2883.23	2803.06	3020.75	3150.75
460.1	2774.61	2828.11	3041.73	3141.73
460.05	2903.34	2960.45	3136.71	3236.71
460	3229.42	3128.58	3361.54	3461.54
459.95	3143.99	3283.94	3448.33	3548.33
459.9	3208.66	3401.74	3622.28	3822.28
459.85	3439.94	3461.75	3683.56	3883.56
459.8	3477.79	3584.54	3773.99	3973.99
459.75	3528.18	3723.86	4051.43	4251.43
459.7	3665.31	4240.78	4559.42	4759.42
459.65	4062.62	4469.88	4750.44	4950.44
459.6	4374.87	4872.11	5155.14	5255.14
459.55	4547.21	5221.77	5825.32	6025.32
459.5	5021.78	5396.5	6140.9	6740.9
459.45	5291.41	5500.71	6418.1	7018.1
459.4	5891.12	6244.19	7123.8	7623.8
459.35	6467.15	6910.59	7781	8181
459.3	6825.59	7262.03	8126	8526
459.25	7691.14	7913.47	8780.5	9180.5
459.2	8468.73	8842.94	9880.1	10180.1
459.15	8996.49	9240.3	10304.4	10204.4
459.1	9746.52	9982.8	10993.5	11393.5
459.05	10382.3	10416	11162.2	11651.2
459	11213.4	11570.7	11792.2	12292.2
458.95	11448.4	11774.7	12248.1	12848.1
458.9	12049.5	12129.2	12715.7	13315.7
458.85	12637.5	12898.8	13401.5	14501.5
458.8	13416.8	13649.3	14186	15686
458.75	13885.7	14083.2	14795.1	16395.1
458.7	13924.4	14258.5	15176.8	17076.8
458.65	14094.3	14348	15382	17382
458.6	14100.9	14422.2	15507.9	17507.9
458.55	13961.5	14265.2	15383.2	17383.2
458.5	13327.5	13850.3	14868.1	16568.1
458.45	12813.8	13469.7	14172	15372
458.4	12391.2	12387.1	13332.2	14532.2
458.35	11681.8	11792	12147	13247
458.3	10927.5	10802.4	10639.2	11839.2
458.25	10097.4	9578.46	9698.08	10798.1
458.2	9268.41	9163.95	8663.88	8763.88
458.15	8349.84	8127.2	7820.36	7719.34
458.1	7987.84	7335.37	7152.89	7231.23
458.05	7389.1	6708.08	6280.88	6198.41
458	6753.09	5970.16	5460.62	5331.44
457.95	6027.61	5458.09	5143.31	5152.28
457.9	5517.31	4894.34	4625.95	4572.98
457.85	4864.14	4405.11	4290.92	4218.76
457.8	4349.02	3916.89	3857.06	3787.82
457.75	3922.88	3494.52	3462.2	3391.22
457.7	3614.31	3297.9	3378.74	3319.31
457.65	3444.37	3202.83	3177.85	3231.41
457.6	3139.62	2846.74	2860.01	2889.19
457.55	2994.25	2661.8	2837.42	2723.88
457.5	2757.68	2442.93	2662.73	2563.09
457.45	2687.2	2279.12	2483.27	2329.86
457.4	2660.98	2147.39	2498.74	2329.01
457.35	2637.04	2204.87	2510.99	2476.77
457.3	2325.67	2080.8	2323.15	2255.51
457.25	2245.78	2110.51	2272.28	2132.81
457.2	2197.97	2055.35	2286.43	2196.38
457.15	2229.39	1943.56	2104.91	2077.27
457.1	2154.11	2007.94	1982.6	1999.29
457.05	2177.03	1856.12	2075.74	1925.98
457	2103.05	1958.74	2002.45	1982.21
456.95	1971.65	1810.66	2084.99	1999.22
456.9	1984.23	1789.76	2012.66	1982.47
456.85	1950.64	1823.87	2101.7	1941.32
456.8	2059.13	1732.9	1919.98	1989.25
456.75	1934.87	1834.78	1894.85	1834.88
456.7	1790.54	1752.43	1895.62	1793.79
456.65	2016.66	1699.61	1750.59	1834.11
456.6	1950.88	1726.43	1813.7	1878.25
456.55	1917.78	1679.55	1730.87	1810.21
456.5	1977.22	1735.13	1757.36	1798.09
456.45	1885.47	1712.28	1877.37	1809.13
456.4	1744.46	1656.29	1934.76	1876.67
456.35	1769.6	1708.46	1769.59	1758.77
456.3	1874.94	1761.9	1750.3	1768.41
456.25	1675.44	1585.47	1594.59	1579.1
456.2	1588.3	1538.92	1552.77	1566.02
456.15	1796.88	1541.27	1678.51	1631.65
456.1	1823.34	1383.1	1623.95	1583.76
456.05	1747.32	1484.18	1537.32	1644.73
456	1666.36	1512.99	1617.67	1655.35
455.95	1671.02	1529.04	1509.98	1554.22
455.9	1666.83	1422.3	1572.93	1625.8
455.85	1657.05	1461.64	1603.43	1634.93
455.8	1675.12	1393.15	1640.88	1688.03
455.75	1733.97	1359.65	1683.67	1656.28
455.7	1770.1	1432.14	1618.33	1674.53
455.65	1639.65	1365.43	1670.75	1635.52

## Sheet: Table S8
		Table S8 The original data of the number of cells migrating to titanium surfaces after 24 h of incubation (4 different fields in 3 samples of different groups)
Group/Number	SLA	UV-SLA	NWs+UV-SLA
	82	115	132
	89	93	106
	80	105	117
	73	88	128
	92	81	129
	97	97	94
	81	108	108
	76	115	123
	69	121	104
	98	105	92
	89	92	126
	101	86	134

## Sheet: Table S9
Table S9 The original data of the adhesion rate of cells on the titanium surfaces after 2 h of incubation (4 different fields in 3 samples of different groups)
Time/Cell attachment(%)	SLA	UV-SLA	NWs+UV-SLA
1h	13.17	20.16	29.63
	15.23	22.63	32.51
	11.52	23.87	34.16
	10.29	19.34	31.69
	16.46	20.58	35.8
	11.93	24.28	36.63
	15.64	25.51	33.74
	12.76	19.75	37.45
	16.87	25.93	32.92
	11.93	23.05	30.04
	14.4	19.75	29.63
	11.52	23.05	32.1
2h	32.21	33.74	47.33
	29.22	35.39	49.79
	27.98	36.63	40.74
	33.74	39.92	44.44
	33.57	37.86	47.74
	27.57	40.74	52.26
	31.28	33.33	43.21
	32.92	41.56	40.33
	29.63	39.09	52.26
	35.39	43.21	45.27
	28.81	39.09	44.44
	33.74	36.21	40.74
4h	63.37	65.02	73.66
	60.08	69.55	81.48
	57.2	71.6	76.95
	65.43	66.26	87.24
	55.97	65.02	76.13
	59.67	69.55	79.01
	52.67	72.84	83.54
	56.38	61.73	78.19
	62.14	74.07	74.07
	58.44	70.78	84.36
	55.56	68.31	77.78
	61.73	71.6	82.72

## Sheet: Table S10
Table S10 The original data of proliferation of cells on titanium surfaces at days 1, 3 and 5 (six samples of each group in the corresponding time interval)
Time/Value	SLA	UV-SLA	NWs+UV-SLA
1d	0.187	0.222	0.263
	0.209	0.236	0.286
	0.214	0.238	0.286
	0.224	0.253	0.297
	0.238	0.259	0.315
	0.259	0.285	0.336
3d	0.494	0.553	0.641
	0.526	0.565	0.621
	0.502	0.525	0.645
	0.519	0.573	0.605
	0.53	0.581	0.604
	0.545	0.546	0.639
5d	0.684	0.763	0.921
	0.692	0.746	0.956
	0.659	0.783	0.948
	0.67	0.778	0.964
	0.681	0.744	0.975
	0.642	0.798	0.939

[truncated: 2 more sheets: Table S11, Table S12]
